# Supplementary figures and images for: Zinc Finger 521 Modulates the Nrf2-Notch Signaling Pathway in Human Ovarian Carcinoma
Source: MDPI journal article supplement (doi:10.3390/ijms241914755), 2023-09-29

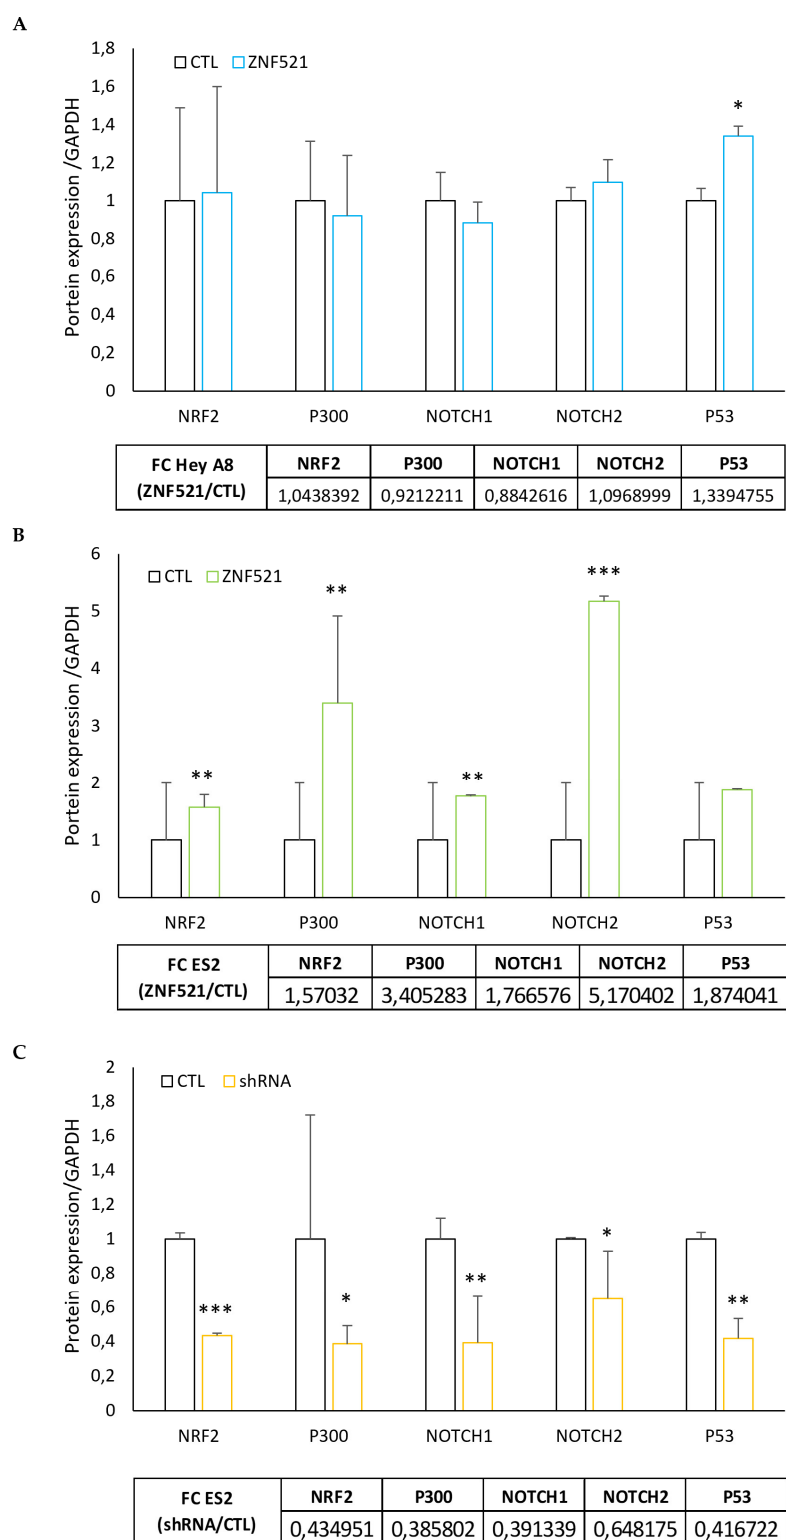

**Figure S1.** (A–C) Densitometric protein analysis: HeyA8 overexpressed for ZNF521.

Supplement: s1 [file s1]
